# Supplementary material for: Self-organisation in photoactive fullerene porphyrin based donor–acceptor ensembles
Source: Royal Society of Chemistry journal article supplement (doi:10.1039/b102141i), 2001-01-01
Supplement: b102141i.doc [file b102141i.doc]

# Supplementary Material

## Self-Organisation in Photoactive Fullerene Porphyrin Based Donor-Acceptor Ensembles

Dirk M.Guldi, Chuping Luo, Andrea Swartz, Michael Scheloske, Andreas Hirsch

Selected spectroscopic data:

**Compound 1:**

1H-NMR (400 MHz, CDCl3): ** = 8.89 (d, 3*J* = 4.86 Hz, 4 H, **-C*H*), 8.75 (d, 3*J* = 4.86 Hz, 4 H, **-C*H*), 8.69 (s, 8 H, **-C*H*), 8.14 (AA’BB’, 4 H, Ar*H*), 7.29 (AA’BB’, 4 H, Ar*H*), 7.25 (s, 12 H, Ar*H*), 4.74 (t, 3*J* = 4.40 Hz, 4 H, C*H*2), 4.51 (t, 3*J* = 4.68 Hz, 4 H, C*H*2), 3.68 (s, 2 H, COC*H*2CO), 2.61 (s, 6 H, *p*-C*H*3), 2.58 (s, 12 H, *p*-C*H*3), 1.84 (s, 12 H, *o*-C*H*3), 1.82 (s, 24 H, *o*-C*H*3);

13C-NMR (100.5 MHz, CDCl3): ** = 166.54 (*C*=O), 157.98 (arom. *C*), 150.19, 149.86, 149.81, 149.72 (**-*C*), 139.26, 139.08, 138.99, 137.34, 136.00 (arom. *C*), 135.39 (arom. *C*H), 132.10, 131.05, 130.51 (**-*C*H), 127.61 (arom. *C*H), 119.65, 118.76, 118.42 (*meso*-*C*), 112.67 (arom. *C*H), 65.93, 64.11 (*C*H2), 41.39 (CO*C*H2CO), 21.75, 21.66, 21.43 (*C*H3);

UV/Vis (CH2Cl2): **max/nm (log **) = 305 (4.54), 400 (sh, 4.90), 421 (5.98), 549 (4.63), 588 (3.89);

MS (FAB): *m/z* = 1795 (MH +);

FT-IR (KBr): /cm-1 = 2968, 2917, 2854, 1741, 1717, 1609, 1509, 1478, 1336, 1245, 998, 800, 725.

**Compound 2:**

1H-NMR (400 MHz, CDCl3): ** = 8.75(d, 3*J* = 4.8 Hz, 4 H, **-C*H*),8.65 (d, 3*J* = 4.0 Hz, 4 H, **-C*H*),8.60 (s, 8H, **-C*H*),7.71 (AA’BB’, 4 H, Ar*H*),7**.**40 (AA’BB’, 4 H, Ar*H*),7.14(s, 12 H, Ar*H*),4.45 (t, 3*J* **=** 4.40 Hz,4 H, C*H*2),4.23(t, 3*J* = 4.40Hz, 4 H, C*H*2),3.42 (s, 2 H, COC*H*2CO),2.54 (s, 6 H, *p*-C*H*3), 2.50 (s, 12 H, *p*-C*H*3),1.78 (s, 12 H, *o*-C*H*3), 1.76 (s, 24 H, *o*-C*H*3);

13C-NMR (100.5 MHz, CDCl3): ** = 166.36 (*C*=O), 156.55 (arom. *C*), 149.86, 149.83, 149.74, 149.70 (**-*C*), 139.29, 139.24, 139.02, 138.95, 137.34 (arom. *C*), 132.00 (arom. *C*H), 131.10, 131.05, 130.61 (**-*C*H), 127.95, 127.60, 127.32 (arom. *C*H), 120.86, 119.42, 118.81, 118,61 (*meso*-*C*), 113.75 (arom. *C*H), 65.79, 63.92 (*C*H2), 41.23 (CO*C*H2CO), 21.75, 21,73, 21.66, 21.43 21.02 (*C*H3);

UV/Vis (CH2Cl2): **max/nm (log **) = 306 (4.35), 401 (4.78), 420 (5.85), 549 (4.48), 587 (3.55)

MS (FAB): *m/z* = 1795 (MH +);

FT-IR (KBr): /cm-1 = 2956, 2921, 2852, 1741, 1718, 1597, 1522, 1476, 1334, 1262, 1061, 998, 798, 721.

**Compound 3:**

1H-NMR (400 MHz, CDCl3): ** = 8.86 (d, 3*J* = 4.64 Hz, 4 H, **-C*H*), 8.70 (d, 3*J* = 4.64 Hz, 4 H, **-C*H*), 8.67 (m, 8 H, **-C*H*), 8.12 (AA’BB’, 4 H, Ar*H*), 7.28 (AA’BB’, 4 H, Ar*H*), 7.20 (s, 12 H, Ar*H*), 5.04 (br, 4 H, C*H*2), 4.65 (br, 4 H, C*H*2), 2.58 (s, 6 H, *p*-C*H*3), 2.53 (s, 12 H, *p*-C*H*3), 1.82 (s, 12 H, *o*-C*H*3), 1.80 (s, 24 H, *o*-C*H*3);

13C-NMR (100.5 MHz, CDCl3): ** = 163.60 (*C*=O), 157.62 (arom. *C*), 150.16, 149.88, 149.81, 149.71 (**-*C*), 144.93, 144.85, 144.71, 144.64, 144.42, 144.23, 144.16, 143.94, 143.28, 142.53, 142.42, 142.24, 141.57, 140.62 (C60 sp2-*C*), 139.39, 139.28, 139.25, 139.05, 138.99, 138.88, 137.33 (C60 sp2-*C* / arom. *C*), 135.52 (arom. *C*H), 132.16, 131.04, 130.59, 129.01 (**-*C*H), 127.63 (arom. *C*H), 119.66, 118.82, 118.45 (*meso*-*C*), 112.77 (arom. *C*H), 71.25 (C60 sp3-*C*), 65.89, 65.65 (*C*H2), 51.95 (Cyclopropan-*C*), 21.79, 21.44 (*C*H3);

UV/Vis (CH2Cl2): **max/nm (log **) = 256 (4.96), 306 (4.61), 324 (4.58), 401 (sh, 4.73), 421 (5.83), 549 (4.43), 587 (3.43);

MS (FAB): *m/z* = 2515 (MH +);

FT-IR (KBr): /cm-1 = 2966, 2948, 2853, 1753, 1608, 1507, 1477, 1434, 1225, 1203, 999, 800, 725, 527.

**Compound 4:**

1H-NMR (400 MHz, CDCl3): ** = 8.73(d, 3*J* = 4.8 Hz, 4 H, **-C*H*),8.61 (d, 3*J* = 4.0 Hz, 4 H, **-C*H*),8.58 (s, 8H, **-C*H*),7.70 (AA’BB’, 4 H, Ar*H*),7**.**38 (AA’BB’, 4 H, Ar*H*),7.14(s, 12 H, Ar*H*),4.48 (t, 3*J* **=** 4.40 Hz,4 H, C*H*2),4.21(t, 3*J* = 4.40Hz, 4 H, C*H*2),2.54 (s, 6 H, *p*-C*H*3), 2.50 (s, 12 H, *p*-C*H*3),1.78 (s, 12 H, *o*-C*H*3), 1.76 (s, 24 H, *o*-C*H*3);

13C-NMR (100.5 MHz, CDCl3): ** = 162.60 (*C*=O), 156.32 (arom. *C*), 150.26, 149.82, 148.09, 147.79 (**-*C*), 145.55, 145.49, 145.09, 144.90, 144.45, 144.27, 143.46, 143.34, 142.95, 142.77, 142.28, 142.04, 141.85, 141.51 (C60 sp2-*C*), 139.39, 139.28, 139.25, 139.05, 138.99, 138.88, 137.33 (C60 sp2-*C* / arom. *C*), 135.52 (arom. *C*H), 132.16, 131.04, 130.59, 129.01 (**-*C*H), 127.63 (arom. *C*H), 119.66, 118.82, 118.45 (*meso*-*C*), 113.88 (arom. *C*H), 72.83 (C60 sp3-*C*), 66.84, 64.63 (*C*H2), 23.74, 22.68 (*C*H3);

UV/Vis (CH2Cl2): **max/nm (log **) = 254(5.58), 308 (4.67), 324 (4.61), 401 (4.66), 423 (5.59), 551 (4.36), 588 (3.75)

MS (FAB): *m/z* = 2515 (MH +);

FT-IR (KBr): /cm-1 = 2957, 2924, 2853, 1743, 1718, 1597, 1523, 1467, 1338, 1262, 1096, 999, 797, 717.
